# Supplementary material for: Recurrence Risk after Radical Colorectal Cancer Surgery—Less Than before, But How High Is It?
Source: PubMed Central journal article supplement (PMC7696064; doi:10.3390/cancers12113308), 2020-11-09
Supplement: cancers-12-03308-s001.pdf [file cancers-12-03308-s001.pdf]

# Supplementary Material: Recurrence Risk After Radical Colorectal Cancer Surgery—Less Than Before, But How High Is It?

Erik Osterman, Klara Hammarström, Israa Imam, Emerik Österlund, Tobias Sjöblom and Bengt Glimelius

**Table 1.** Demographics of non-metastatic patients in a population-based Swedish Colorectal Cancer cohort diagnosed between 2010-2017.

| Variable           | Characteristics     | Total          | Colon          | Rectum         |
|--------------------|---------------------|----------------|----------------|----------------|
| Sex                | Male                | 531 (55%)      | 334 (52%)      | 197 (60%)      |
|                    | Female              | 440 (45%)      | 310 (48%)      | 130 (40%)      |
| Age                | Mean (SD)           | 70 ( $\pm$ 12) | 71 ( $\pm$ 12) | 67 ( $\pm$ 11) |
| Tumour location    | Right               | 359 (37%)      | 359 (56%)      |                |
|                    | Left                | 284 (29%)      | 284 (44%)      |                |
|                    | Rectal              | 327 (34%)      |                | 327 (100%)     |
|                    | Missing info        | 1 (0%)         | 1 (0%)         |                |
| Surgery            | Elective            | 864 (89%)      | 539 (84%)      | 325 (99%)      |
|                    | Emergency           | 107 (11%)      | 105 (16%)      | 2 (1%)         |
| Found nodes        | Mean (SD)           | 22 ( $\pm$ 12) | 24 ( $\pm$ 13) | 19 ( $\pm$ 11) |
|                    | Missing information | 44 (5%)        | 26 (4%)        | 18 (6%)        |
| Risk factors*      | 0                   | 499 (51%)      | 311 (48%)      | 188 (57%)      |
|                    | 1                   | 274 (28%)      | 166 (26%)      | 108 (33%)      |
|                    | 2+                  | 198 (20%)      | 167 (26%)      | 31 (9%)        |
| Stage I            | Adjuvant treatment  |                |                |                |
|                    | No                  | 140 (94%)      | 103 (99%)      | 37 (82%)       |
| Stage II           | Yes                 | 9 (6%)         | 1 (1%)         | 8 (18%)        |
|                    | No                  | 266 (83%)      | 207 (73%)      | 59 (94%)       |
| Stage III          | Monotherapy         | 28 (9%)        | 28 (18%)       | 0 (0%)         |
|                    | Combination therapy | 26 (8%)        | 22 (9%)        | 4 (6%)         |
|                    | No                  | 133 (41%)      | 100 (38%)      | 33 (25%)       |
|                    | Monotherapy         | 66 (20%)       | 66 (25%)       | 0 (0%)         |
| Recurrence         | Combination therapy | 126 (39%)      | 95 (36%)       | 31 (25%)       |
|                    | No                  | 808 (83%)      | 544 (84%)      | 264 (81%)      |
| Local recurrence   | Yes                 | 163 (17%)      | 100 (16%)      | 63 (19%)       |
|                    | No                  | 943 (97%)      | 628 (98%)      | 315 (96%)      |
| Distant recurrence | Yes                 | 28 (3%)        | 16 (2%)        | 12 (4%)        |
|                    | No                  | 822 (85%)      | 552 (86%)      | 270 (83%)      |
| Survival           | Yes                 | 149 (15%)      | 92 (14%)       | 57 (17%)       |
|                    | Alive               | 697 (72%)      | 444 (69%)      | 253 (77%)      |
|                    | Dead                | 274 (28%)      | 200 (31%)      | 74 (23%)       |

\* Risk factors = Emergency surgery, fewer than 12 nodes investigated, vascular or perineural invasion, undifferentiated/high grade differentiation, and pT4.

**Publisher's Note:** MDPI stays neutral with regard to jurisdictional claims in published maps and institutional affiliations.

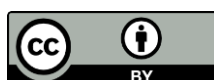

© 2020 by the authors. Licensee MDPI, Basel, Switzerland. This article is an open access article distributed under the terms and conditions of the Creative Commons Attribution (CC BY) license (<http://creativecommons.org/licenses/by/4.0/>).
